# Supplementary material
Source: PubMed Central journal article supplement (PMC3151258)
Supplement: halms530265-supplement_1.pdf [file halms530265-supplement_1.pdf]

**Online appendix: Sensitivity analysis comparing findings based on two alternative CHD definitions**

**A: CHD cases including only participants with confirmed myocardial infarction**

|                                 |     | No CHD      |                   | CHD                |
|---------------------------------|-----|-------------|-------------------|--------------------|
| <b>All-cause mortality</b>      |     |             |                   |                    |
| <b>Depressive symptoms</b>      |     |             |                   |                    |
| <b>Model 1</b>                  | No  | HR (95% CI) | 1 (reference)     | 1.74 (0.91-3.33)   |
|                                 | Yes | HR (95% CI) | 2.28 (1.58-3.27)‡ | 5.09 (2.35-11.02)‡ |
| <b>Cardiovascular mortality</b> |     |             |                   |                    |
| <b>Depressive symptoms</b>      |     |             |                   |                    |
| <b>Model 1</b>                  | No  | HR (95% CI) | 1 (reference)     | 2.50 (0.87-7.18)   |
|                                 | Yes | HR (95% CI) | 2.59 (1.28-5.22)† | 7.72 (2.31-25.82)‡ |

**B= CHD cases defined participants with both confirmed MI and definite angina**

|                                 |     | No CHD      |                   | CHD                |
|---------------------------------|-----|-------------|-------------------|--------------------|
| <b>All-cause mortality</b>      |     |             |                   |                    |
| <b>Depressive symptoms</b>      |     |             |                   |                    |
| <b>Model 1</b>                  | No  | HR (95% CI) | 1 (reference)     | 1.67 (1.05-2.66)*  |
|                                 | Yes | HR (95% CI) | 2.10 (1.41-3.13)‡ | 4.99 (2.89-8.62)‡  |
| <b>Cardiovascular mortality</b> |     |             |                   |                    |
| <b>Depressive symptoms</b>      |     |             |                   |                    |
| <b>Model 1</b>                  | No  | HR (95% CI) | 1 (reference)     | 2.29 (1.02-5.14)*  |
|                                 | Yes | HR (95% CI) | 2.52 (1.17-5.43)* | 6.69 (2.54-17.54)‡ |
